# Supplementary material for: Transcriptome profiling of ontogeny in the acridid grasshopper Chorthippus biguttulus
Source: PubMed Central journal article supplement (PMC5435247; doi:10.1371/journal.pone.0177367), 2017-05-17

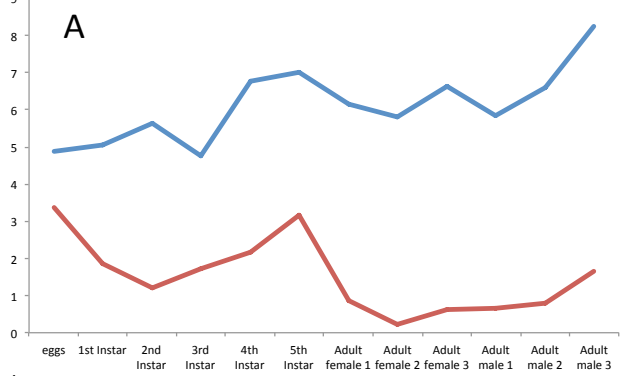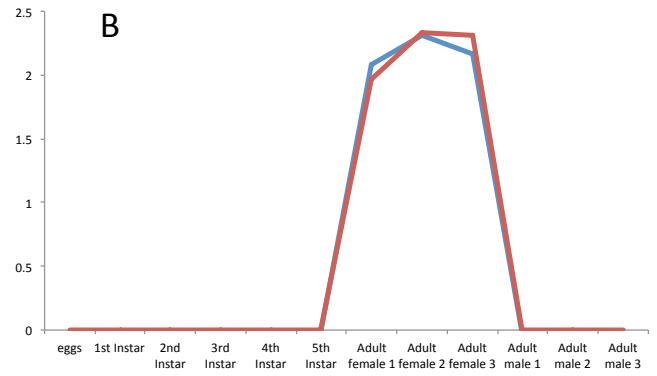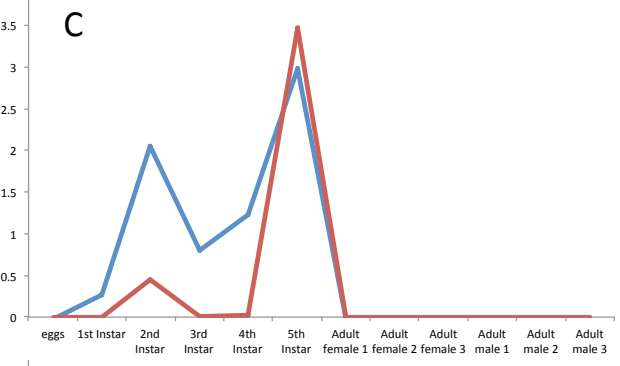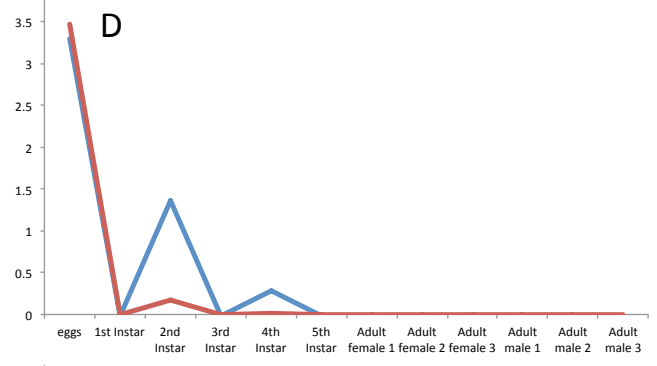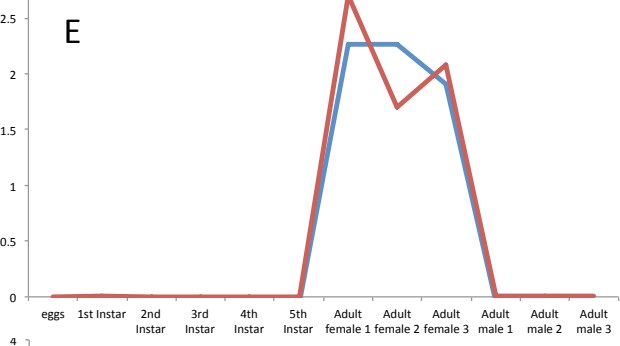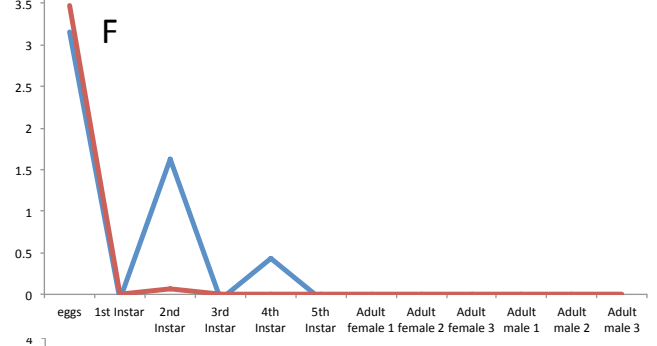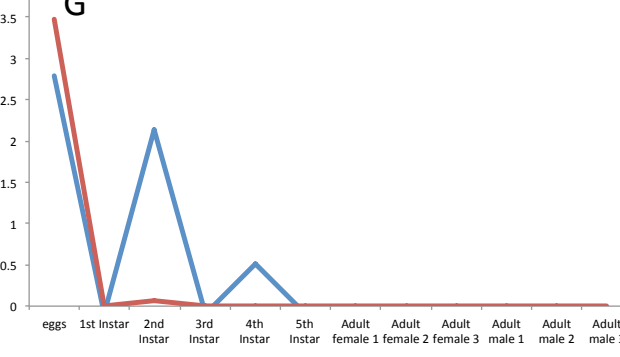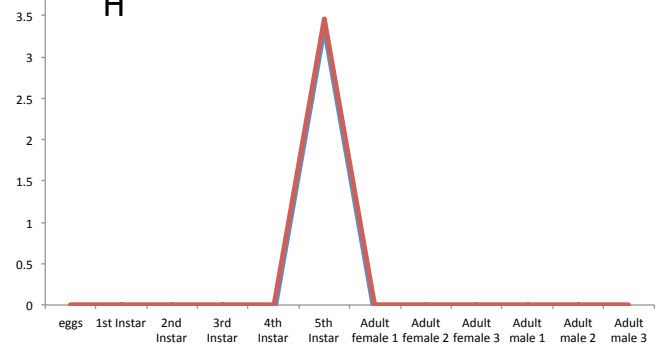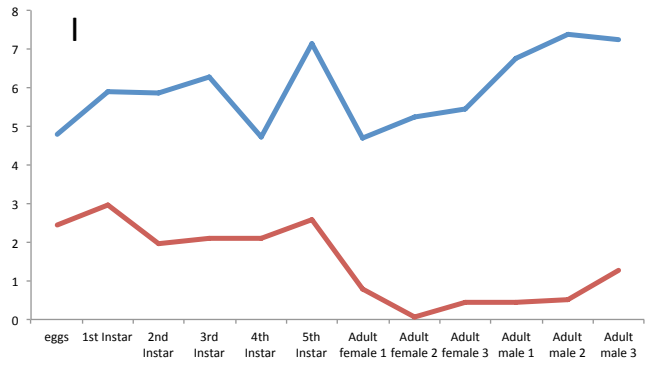

Supplement: pone.0177367.s001.pdf [file pone.0177367.s001.pdf]
